# Supplementary material for: 2-Desaza-annomontine (C81) impedes angiogenesis through reduced VEGFR2 expression derived from inhibition of CDC2-like kinases
Source: Springer Nature journal article supplement (doi:10.1007/s10456-024-09906-y), 2024-02-26
Supplement: MOESM1 [file 26782472]

Supplementary figures to:

**2-Desaza-annomontine impedes angiogenesis through reduced VEGFR2 expression derived from inhibition of CDC2-like kinases.**

Zech, T. J.<sup>1</sup>; Wolf, A.<sup>2,3</sup>; Hector, M.<sup>2</sup>; Bischoff-Kont, I.<sup>1</sup>; Krishnathas, G. M.<sup>1</sup>; Kuntschar, S.<sup>4</sup>; Schmid, T.<sup>4</sup>; Bracher, F.<sup>5</sup>; Langmann, T.<sup>2,3</sup>; Fürst, R.<sup>1,6</sup>

<sup>1</sup> Institute for Pharmaceutical Biology, Faculty of Biochemistry, Chemistry and Pharmacy, Goethe-University of Frankfurt, Frankfurt, Germany

<sup>2</sup> Laboratory for Experimental Immunology of the Eye, Department of Ophthalmology, University of Cologne, Faculty of Medicine and University Hospital Cologne, Cologne, Germany

<sup>3</sup> Centre for Molecular Medicine Cologne (CMMC), University of Cologne, Cologne, Germany

<sup>4</sup> Institute of Biochemistry I, Faculty of Medicine, Goethe-University of Frankfurt, Frankfurt, Germany

<sup>5</sup> Pharmaceutical Chemistry, Department of Pharmacy – Center for Drug Research, Ludwig-Maximilians-Universität München, Munich, Germany

<sup>6</sup> Pharmaceutical Biology, Department of Pharmacy – Center for Drug Research, Ludwig-Maximilians-Universität München, Munich, Germany

For correspondence, please contact Prof. Robert Fürst, Pharmaceutical Biology, Department of Pharmacy – Center for Drug Research, Ludwig-Maximilians-Universität München, Munich, Germany  
Robert.Fuerst@cup.uni-muenchen.de

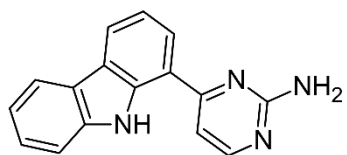

**C81**

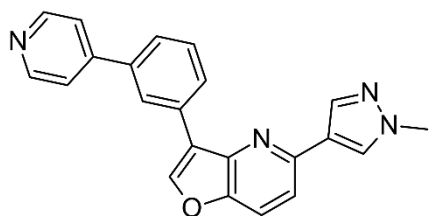

**MU1210**

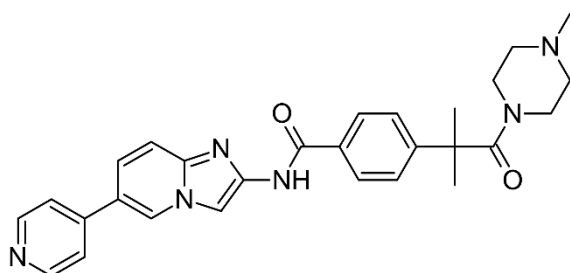

**T3-CLK**

**Supplementary Fig. 1 Structures of C81, MU1210 and T3 CLK**  
Structures were drawn using ChemSketch (ACD/Labs).

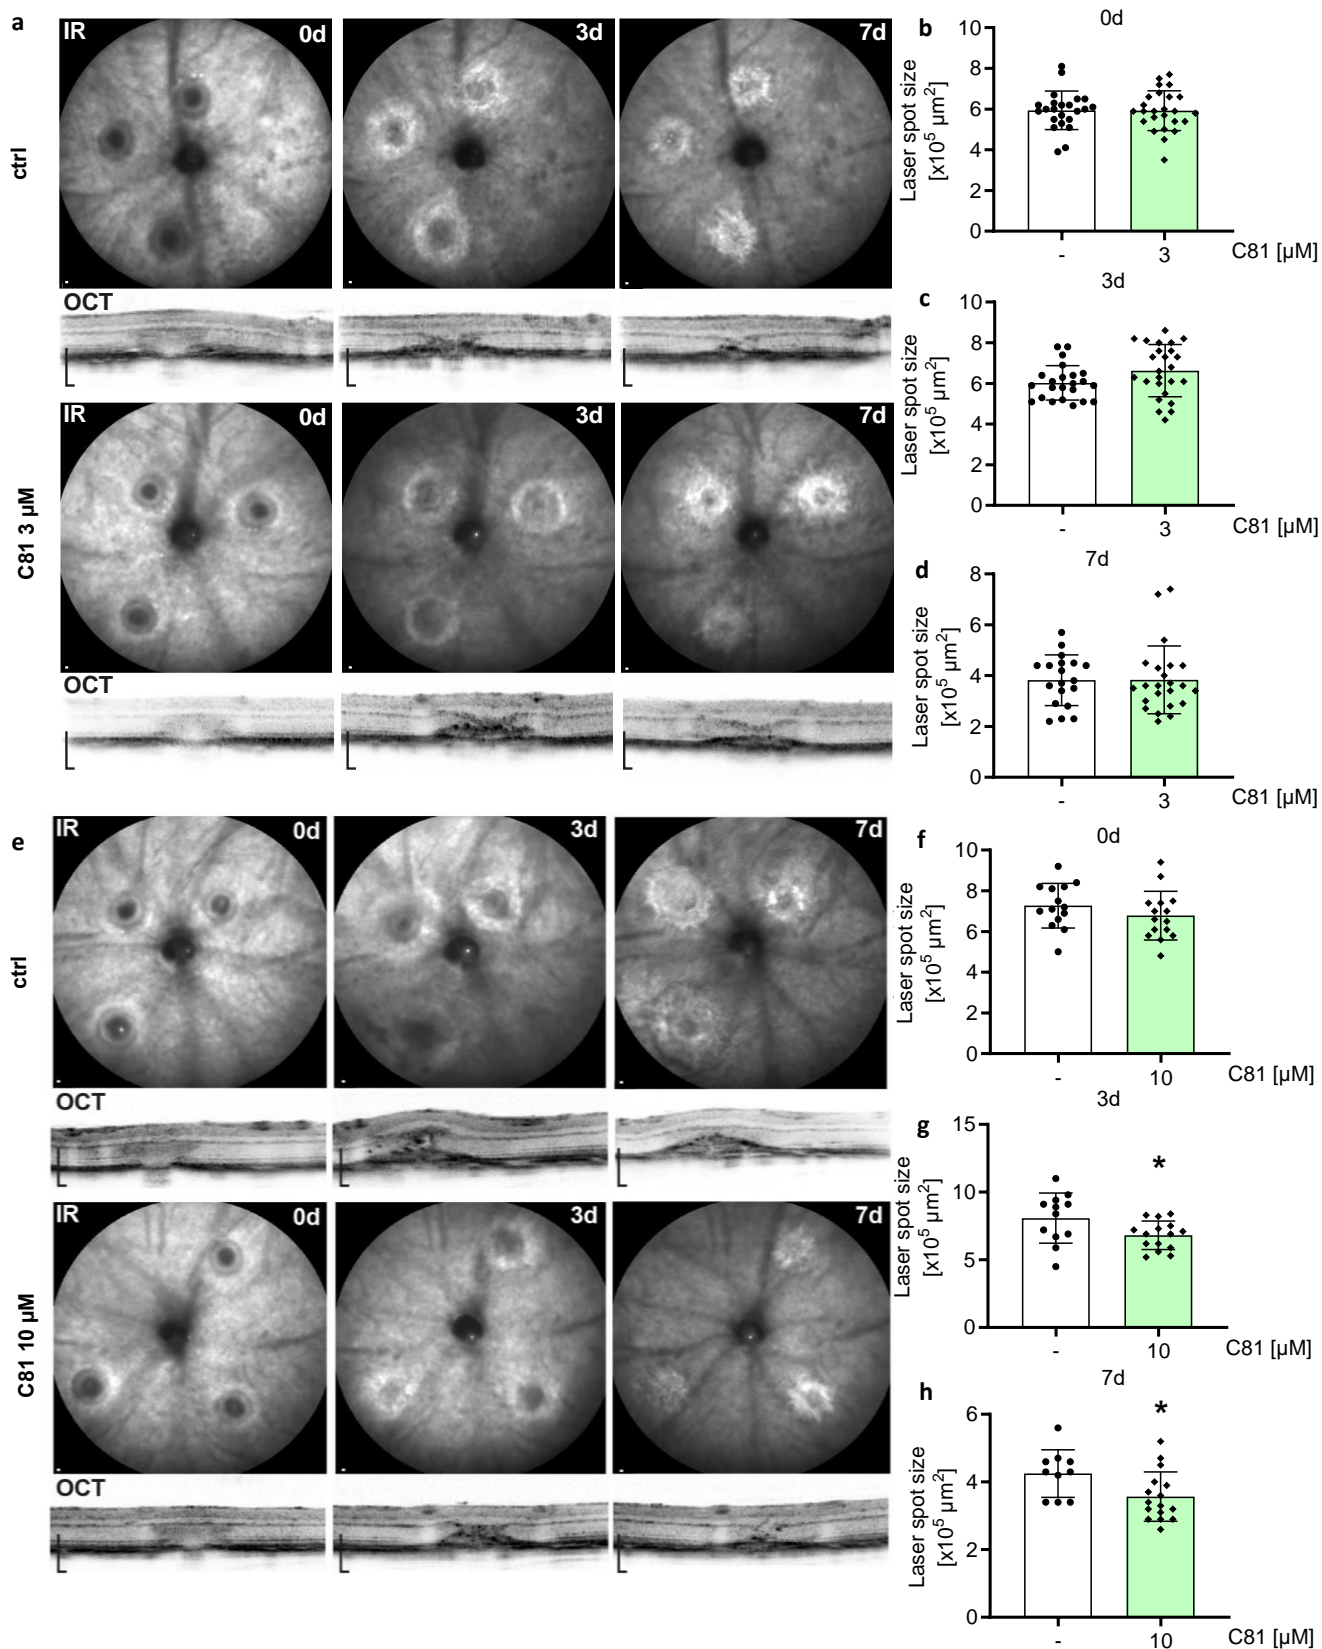

### Supplementary Fig. 2 Laser spot size in CNV model

**a/e** Representative infrared (IR) fundus images at indicated time points and treatments post laser injury. Lower panel shows OCT scan from one laser spot. Scale bar: 200 μm. **b-d/f-h** Quantification of laser spot size. **b-d** n = 19-25 eyes, **f-h** n = 10-15 eyes. Data show mean ± SD, two-tailed unpaired Student's t test; \*p ≤ 0.05

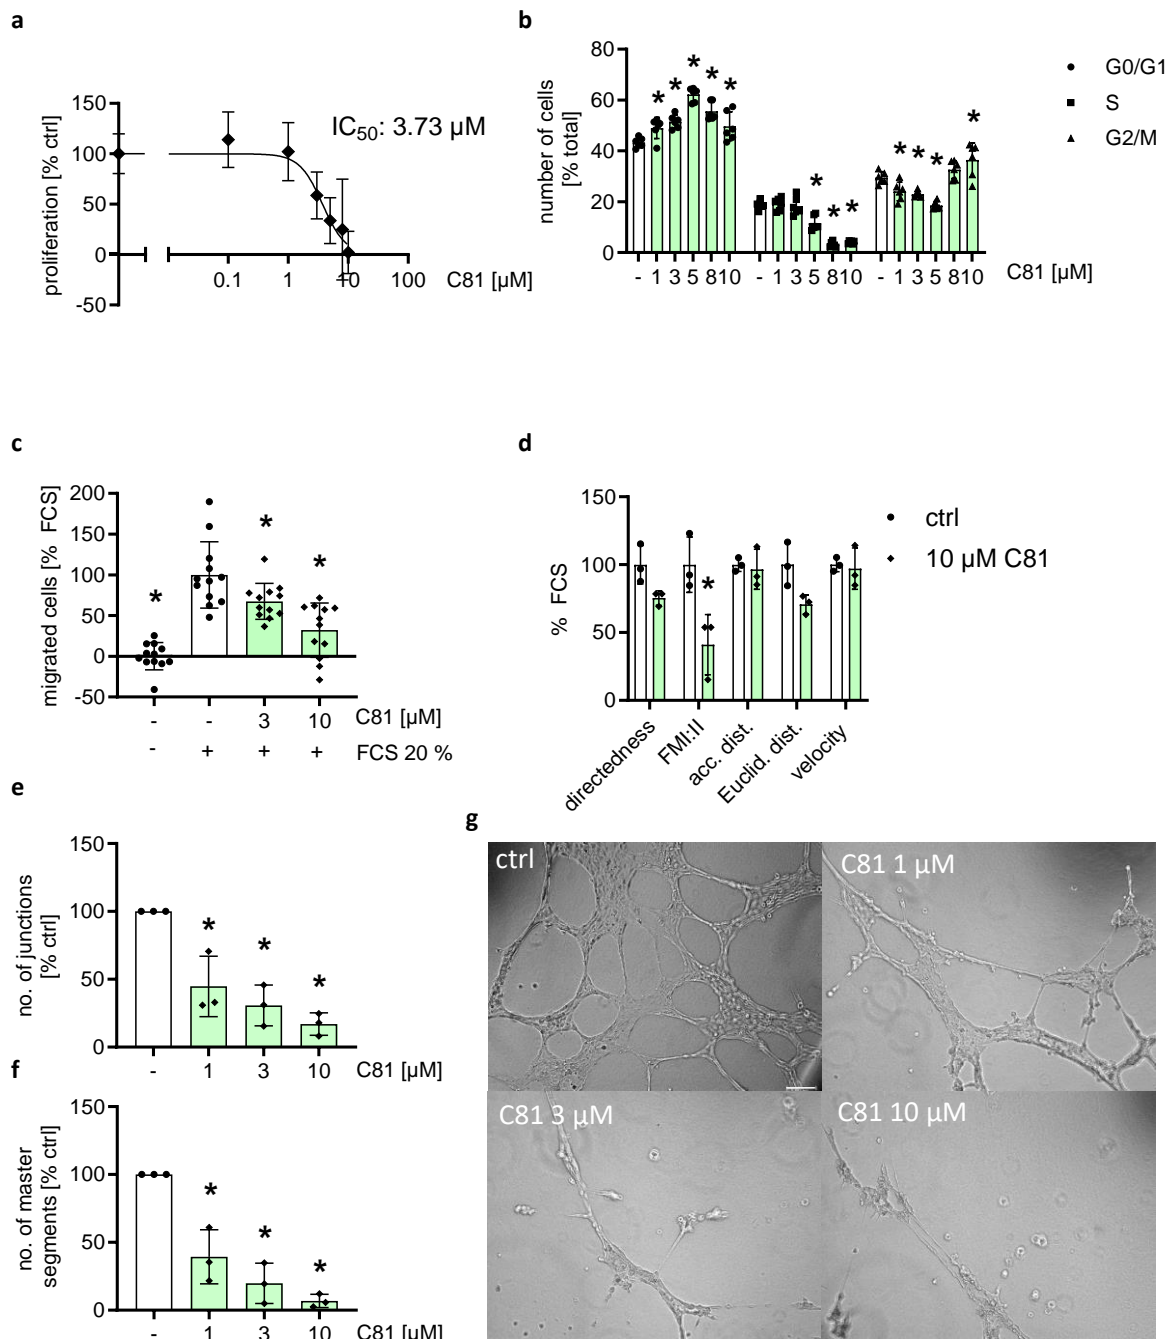

**Supplementary Fig. 3 Effect of C81 on proliferation chemotactic migration and tube formation of HUVECs**

**a** Quantification of proliferation of HUVECs in a crystal violet assay. **b** Distribution of HUVECs in the indicated stages of the cell cycle quantified through Propidium iodide staining and Flow cytometry. **c** quantification of migration of HUVECs along a 0-20 % FCS gradient by crystal violet staining. **d** Quantification of directedness, forward migration index in parallel to the chemoattractant, accumulated distance, Euclidian distance, and velocity of scarcely seeded HUVECs along a 0-20 % FCS gradient over 20 h. **e/f** Quantification of tube formation for number of junctions (**e**) or number of master segments (**f**). **g** representative images of HUVEC tubes on Matrigel. **a-d/e/f** Data show mean ± SD, **a** IC<sub>50</sub> was calculated using a nonlinear regression with a variable slope **b/d** two-way ANOVA with Dunnett's post hoc test testing for a simple effect within cell cycle stages (**b**) or mode of quantification (**d**). **c/e/f** One-way ANOVA with Dunnett's post hoc analysis comparing treatments and no-gradient control vs vehicle control (**c**) or comparing treatments to vehicle control (**e/f**). \*p ≤ 0.05 vs vehicle control within cell cycle stage (**b**), vehicle control (**c/e/f**) or mode of quantification (**d**). **g** Scalebar represents 100 μm.

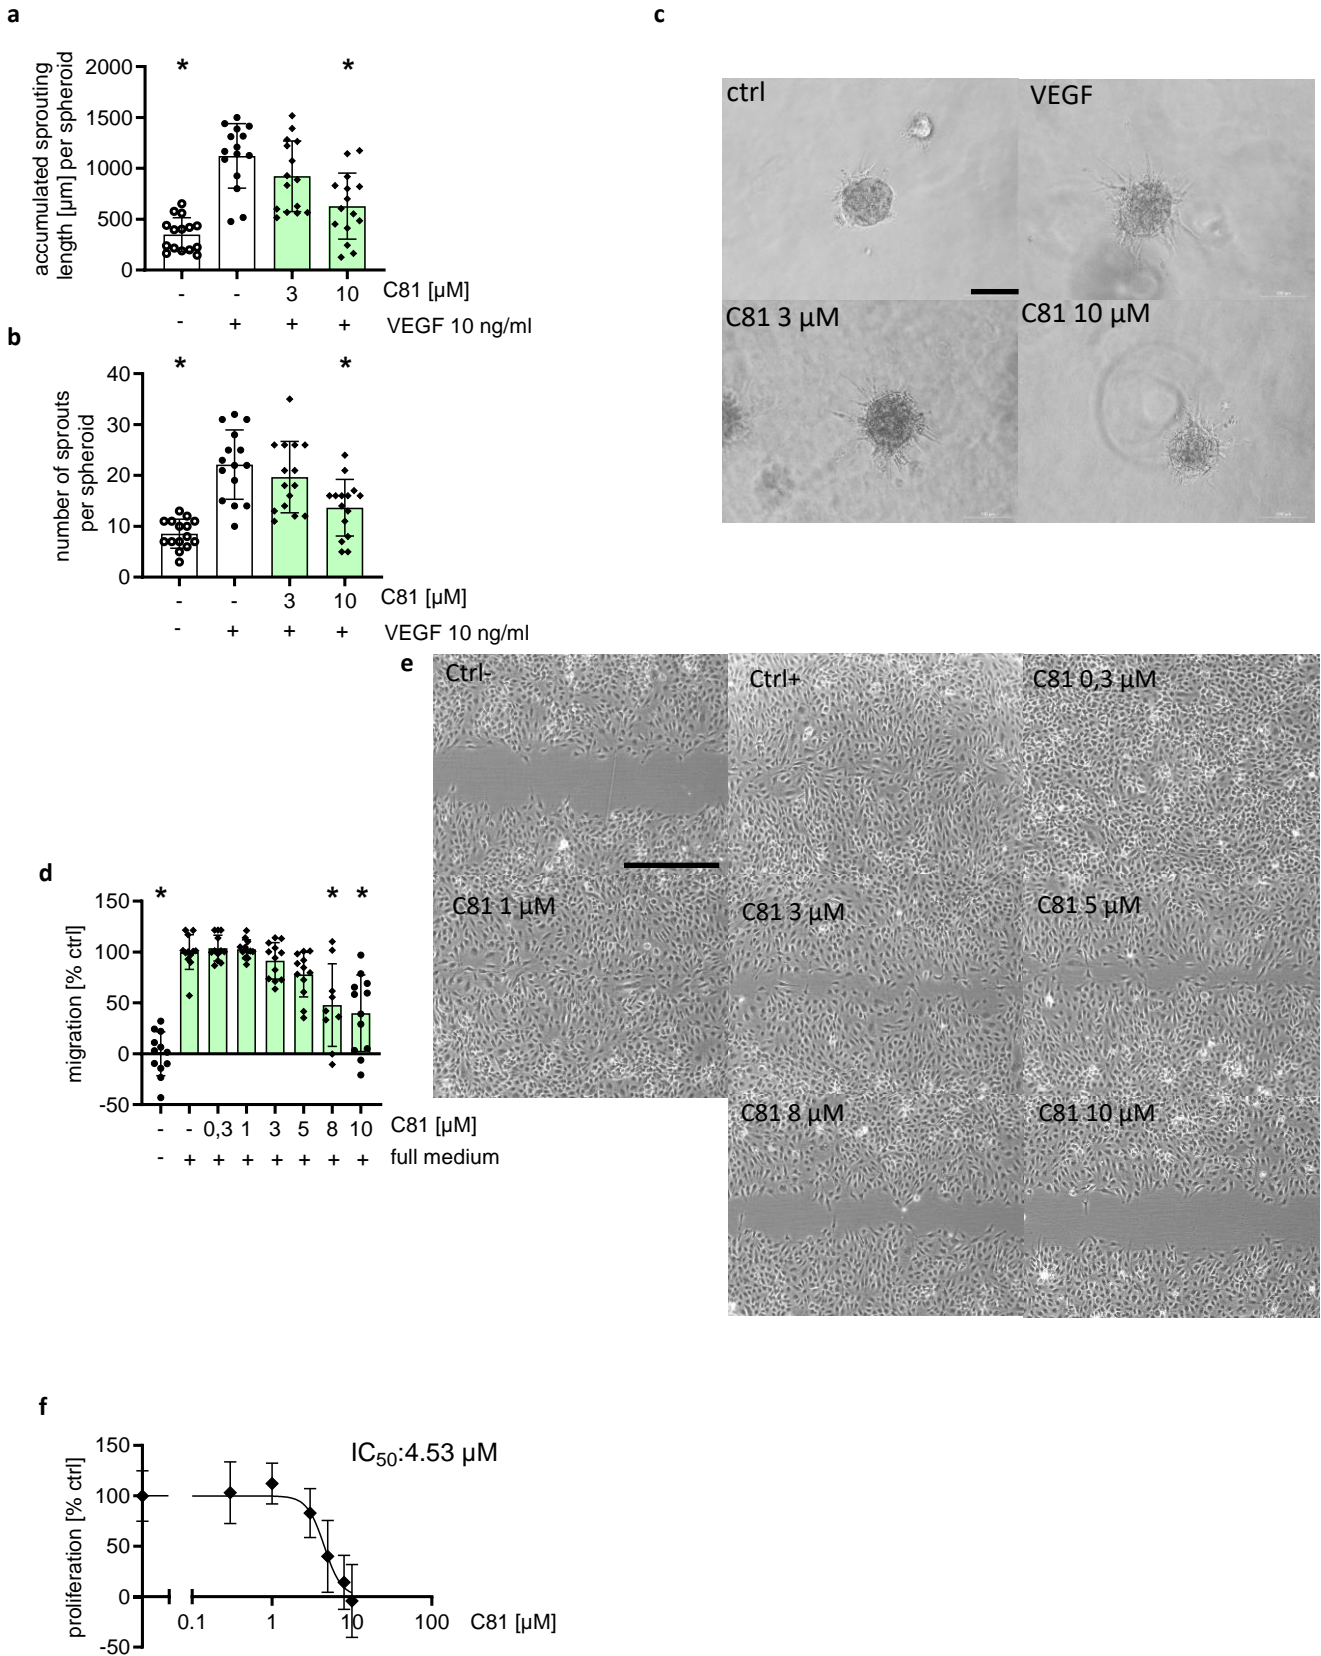

**Supplementary Fig. 4 C81 inhibits angiogenic key steps *in vitro* in HMEC-1**

**a/b** Quantification of HMEC-1 spheroids pretreated for 30 min with the indicated concentrations of C81/vehicle control and stimulated with VEGF for 20 h for accumulated sprouting length per spheroid (**a**) and number of sprouts per spheroid (**b**). **c** Representative images of collagen embedded HMEC-1 spheroids at the end of treatment. **d** Quantification of scratches for closed surface area under treatment of C81, negative ctrl served as a baseline. **e** Representative images of scratches after incubation. **f** Quantification of proliferation of HMEC-1 in a crystal violet assay

**Donor 1**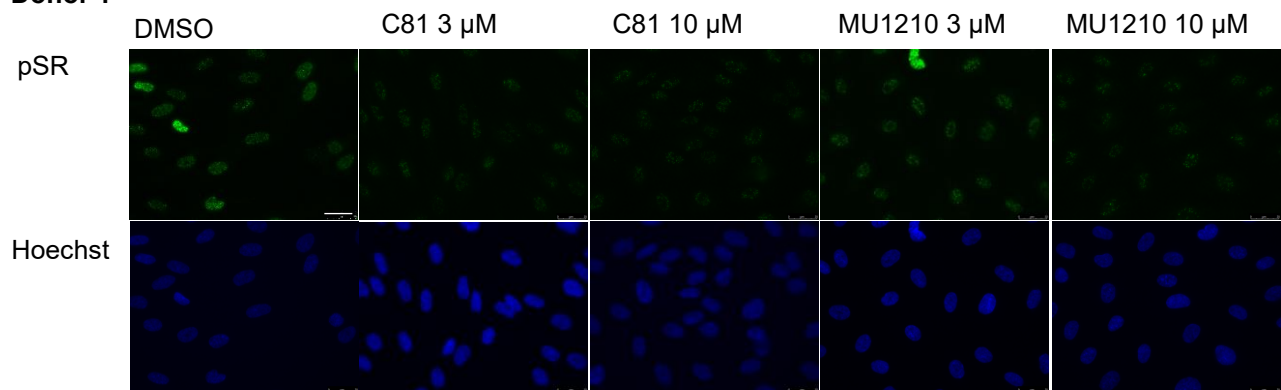**Donor 2**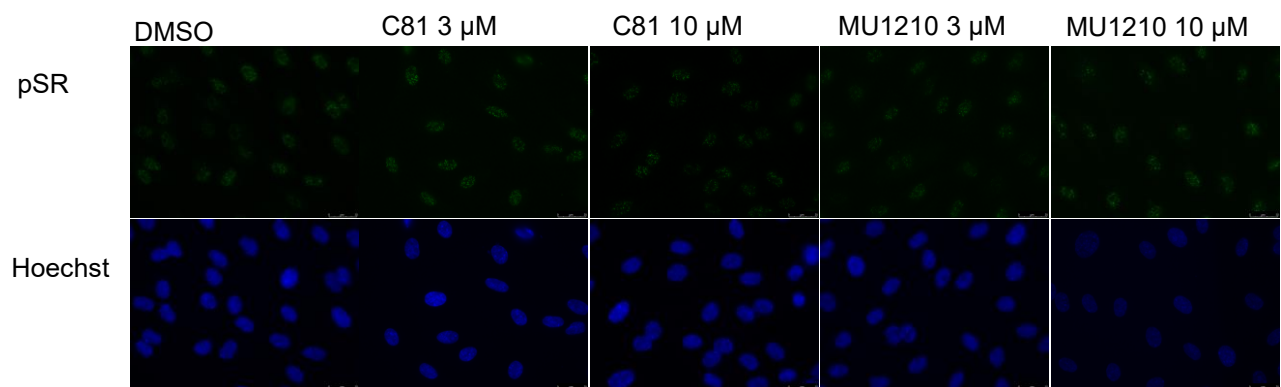**Donor 3**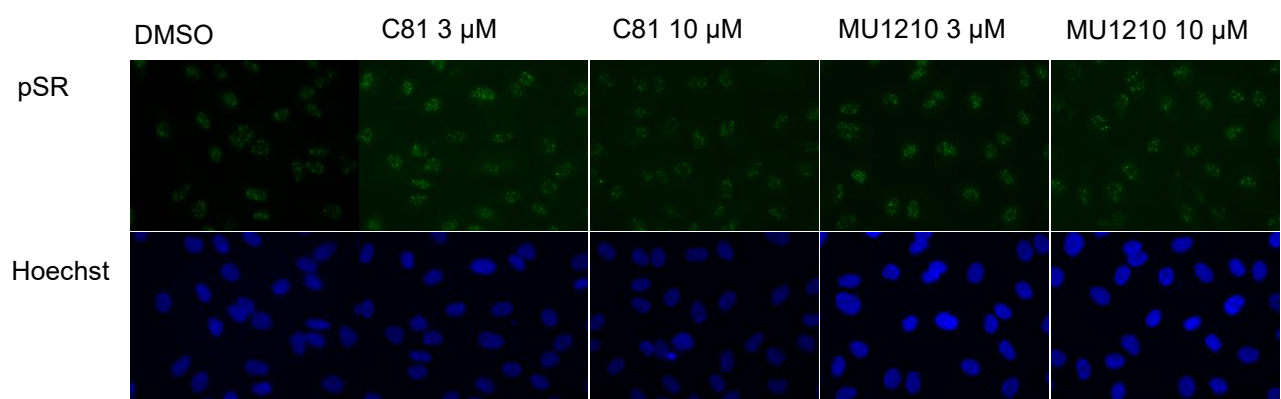**Supplementary Fig. 5 Unedited images of IGCs in HUVECs**

Immunofluorescence pictures of HUVECs stained with Hoechst 33342 for the nuclei and anti-p-SR proteins to mark interchromatin granule clusters. Altered distribution can be observed when HUVECs are treated with C81 or MU1210 for 6 h.

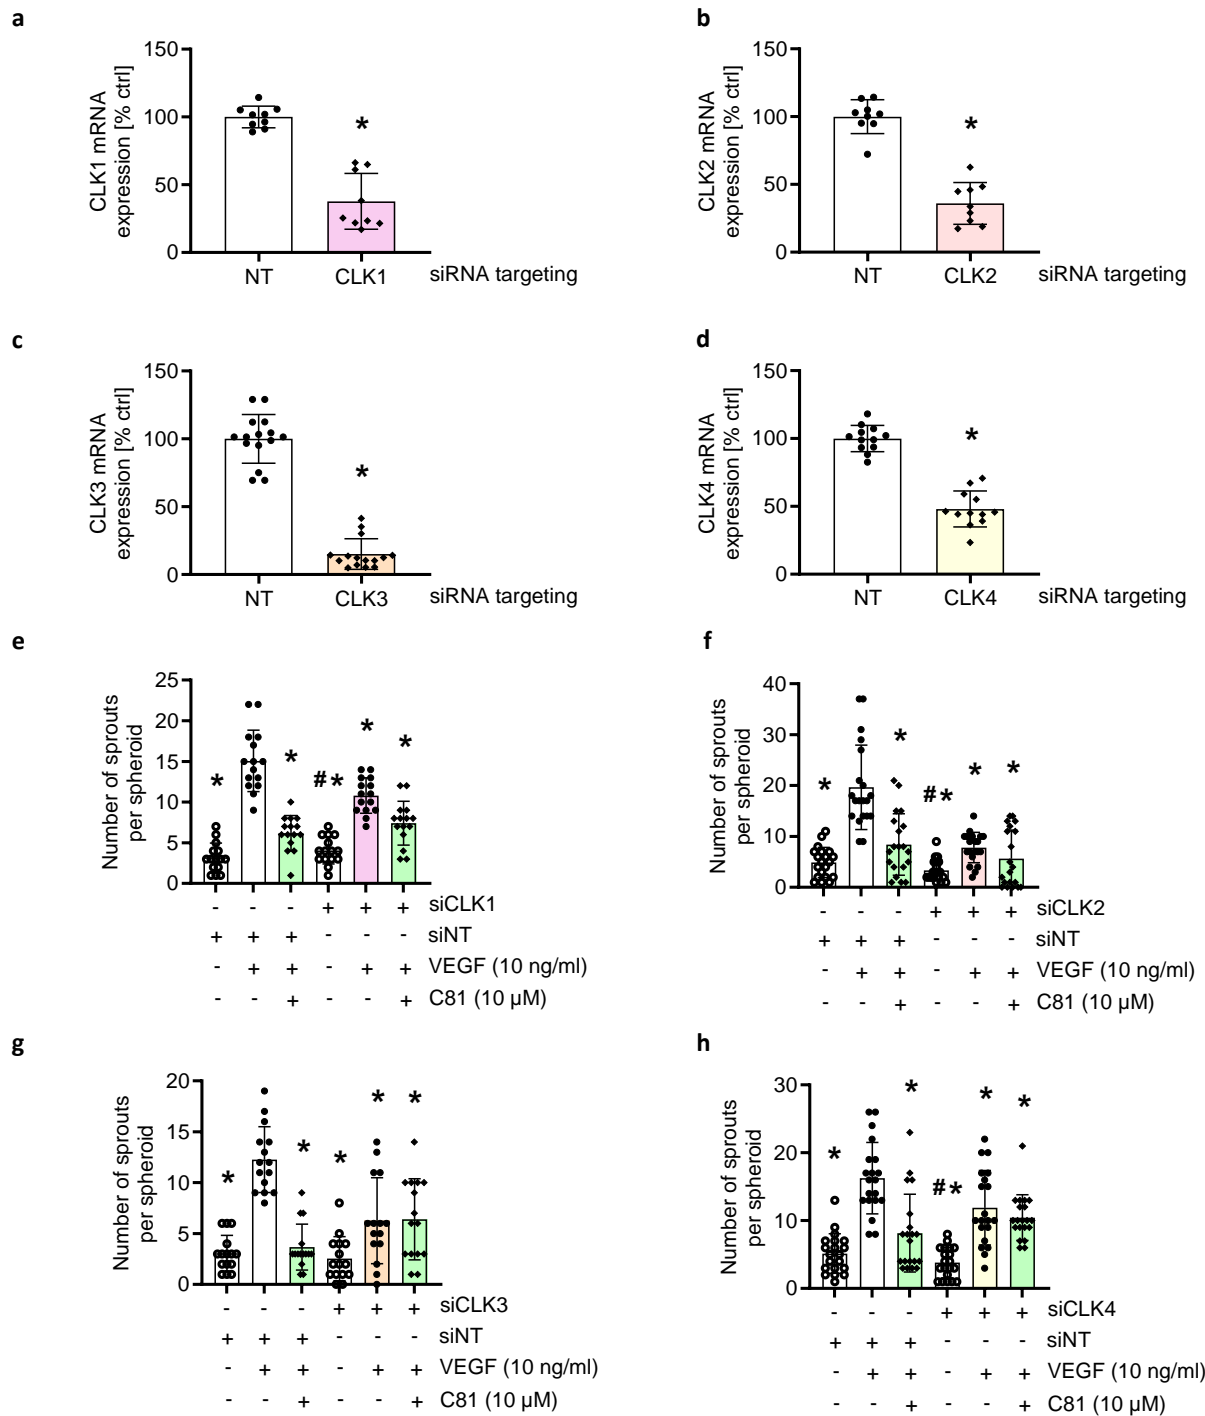

**Supplementary Fig. 6 Quantification of CLK1-4 knockdowns and additional quantification of knockdown spheroids**

**a-d** Relative quantification of CLK1-4 mRNA expression, normalized to GAPDH, 72 h after the indicated knockdown was induced in HUVECs. **e-h** Quantification of HUVEC spheroids embedded into collagen 72 h after the indicated knockdown was induced, pretreated for 30 min with the indicated concentrations of C81/vehicle control and stimulated with VEGF for 20 h for number of sprouts per spheroid. **a-h** Data are represented as mean  $\pm$  SD,  $n = 3$  donors (**a-e/g**) or  $n = 4$  donors (**f/h**). **a-d** unpaired student's t-test; **e-h** one-way ANOVA with Tuckey's post hoc test. **a-h** \* $p \leq 0.05$  compared to non-targeting control (**a-d**) or VEGF non targeting control (**e-h**); **e-h** # $p \leq 0.05$  compared to knockdown cells stimulated with VEGF, only used to compare treatments of knockdown cells.

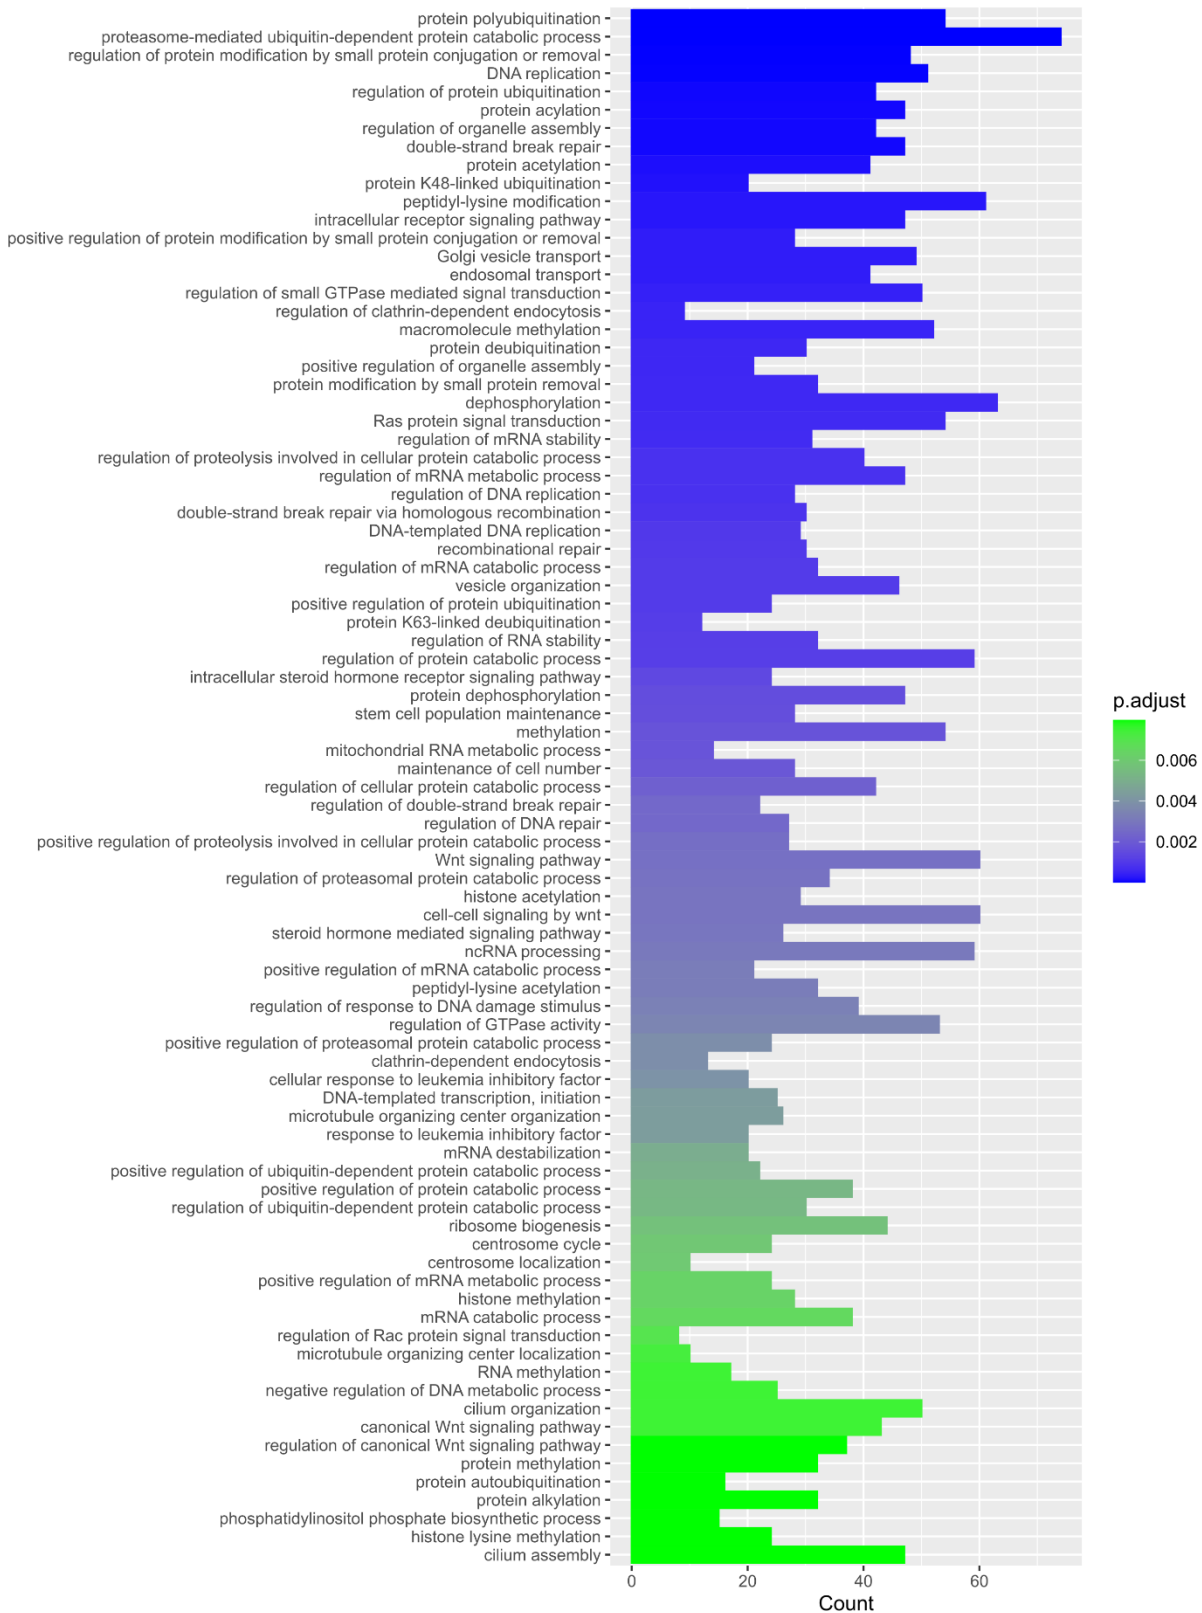

**Supplementary Fig. 7 RNA-Seq of C81 treated cells detects multiple affected biological processes, and notably WNT/ $\beta$ -catenin as an affected signaling pathway**

GO-Term analysis of biological processes affected by 6 h treatment of HUVECs with 10  $\mu$ M C81 compared to vehicle control, detected using short read RNA-Seq. N = 3 donors.



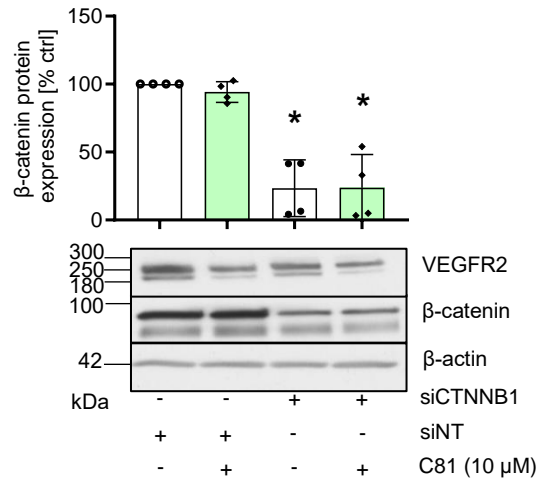

### Supplementary Fig. 8 $\beta$ -Catenin knockdown efficiency

Semiquantitative analysis of  $\beta$ -catenin protein expression, normalized to  $\beta$ -actin, using densitometry in Fiji/ImageJ in HUVECs 48 h after knockdown was induced. C81 was added for the final 10 h of the incubation. Data are depicted as mean  $\pm$  SD, one-way ANOVA with Dunnett's post hoc test, \* $p \leq 0.05$  compared to the non-targeting control.
